# Supplementary material for: High electrochemiluminescence of a new water-soluble iridium(iii) complex for determination of antibiotics
Source: Royal Society of Chemistry journal article supplement (doi:10.1039/c0an00444h), 2010-10-13
Supplement: c0an00444h.pdf [file c0an00444h.pdf]

## Supporting Information

### Experimental Section

**Apparatus.**  $^1\text{H}$  NMR spectra were recorded on a Bruker Avance III (400 MHz) spectrometer at room temperature with chemical shifts reported relative to tetramethylsilane. Electrospray mass spectra (ESI-MS) were recorded on a Thermo Finnigan LCQ Deca XP max (Finnigan, USA) spectrometer. Elemental analysis of complexes was performed on a Vario MICRO instrument. The absorption spectra were recorded on a Lambda 750 spectrophotometer. Steady-state emission spectra were recorded on a Hitachi fluorescence F-4600 spectrophotometer (PMT: 700V).

The photophysical data of  $[\text{Ir}(\text{pq})_2(\text{bpy-sugar})]\text{Cl}$  were listed in Table 1.

**Table 1.** Photophysical Properties of complexes at Room Temperature

| complex                                               | $\lambda_{\text{abs}}/\text{nm}(\epsilon/10^4 \text{ dm}^3 \text{ mol}^{-1} \text{ cm}^{-1})$ | $\lambda_{\text{em}}/\text{nm}$ | $\Phi_{\text{em}}^{\text{a}}$            | $\Phi_{\text{ecl}}^{\text{b}}$ | $\tau/\mu\text{s}$       |
|-------------------------------------------------------|-----------------------------------------------------------------------------------------------|---------------------------------|------------------------------------------|--------------------------------|--------------------------|
| $[\text{Ir}(\text{pq})_2(\text{bpy-sugar})]\text{Cl}$ | 266 (4.61), 319 (1.81), 336 (1.38), 432 (0.34)                                                | 557                             | 0.117 (0.084)                            | 5.3                            | 1.02 (0.53)              |
| $[\text{Ru}(\text{bpy})_3]\text{Cl}_2$                | —                                                                                             | 610 <sup>1</sup>                | 0.042 <sup>1</sup> (0.028 <sup>2</sup> ) | 1.0                            | 0.64 <sup>1</sup> (0.48) |

The data of complexes were measured at 298 K. <sup>a</sup>The excitation wavelength for the complex was 430 nm. The luminescence quantum yields were calculated using  $[\text{Ru}(\text{bpy})_3]\text{Cl}_2$  in degassed aqueous solution as the standard. The data in ( ) were measured in aerated aqueous solution.

<sup>b</sup>Relative ECL efficiency vs.  $[\text{Ru}(\text{bpy})_3]^{2+}$  (1.0), TPrA (20 mM) in phosphate buffer (0.1 M, pH = 7.5).

### Reference:

- 1 J. Van Houten. R. J. Watts, *J. Am. Chem. Soc.* **1976**, 98, 4853.
- 2 K. Nakamaru, *Bull. Chem. Soc. Jpn.* **1982**, 55, 269

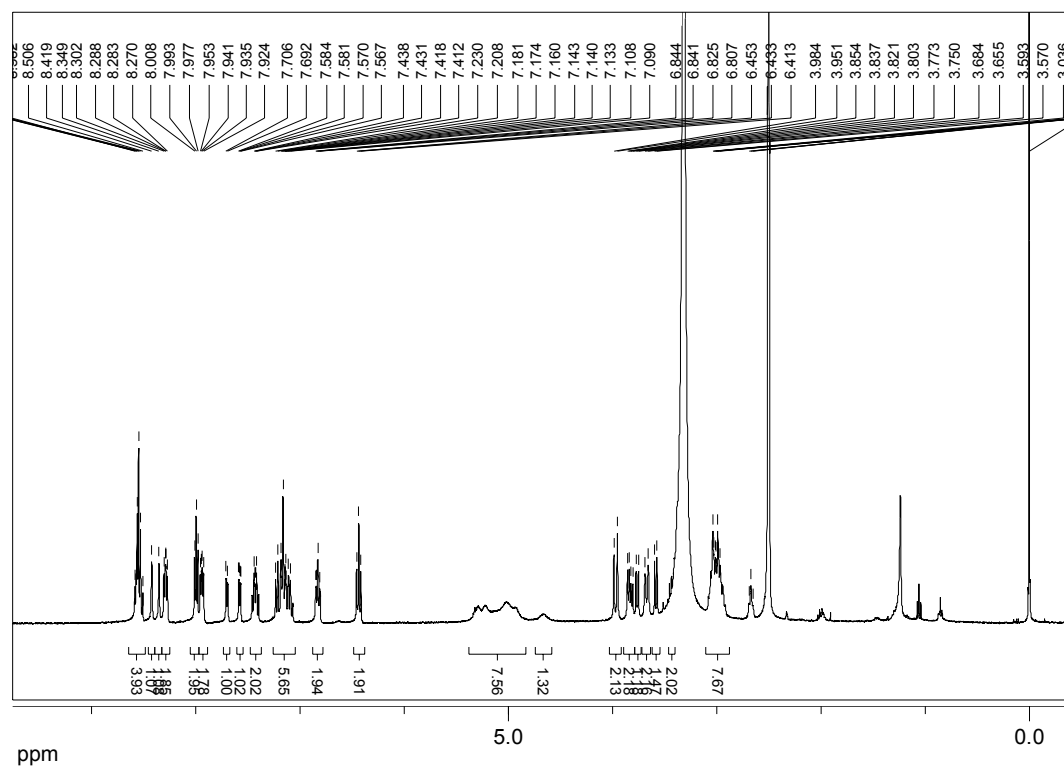

Figure S1.  $^1\text{H}$  NMR spectrum of  $[\text{Ir}(\text{pq})_2(\text{bpy-sugar})]\text{Cl}$  in  $\text{DMSO-d}_6$  at  $25^\circ\text{C}$ .

D:\Data\SWpq12r  
ESI

01/25/2010 05:00:13 PM

pq12r

pq12r #40 RT: 1.31 AV: 1 SB: 19 0.71-1.17 NL: 1.75E6  
T: + c ESI Full ms [200.00-2000.00]

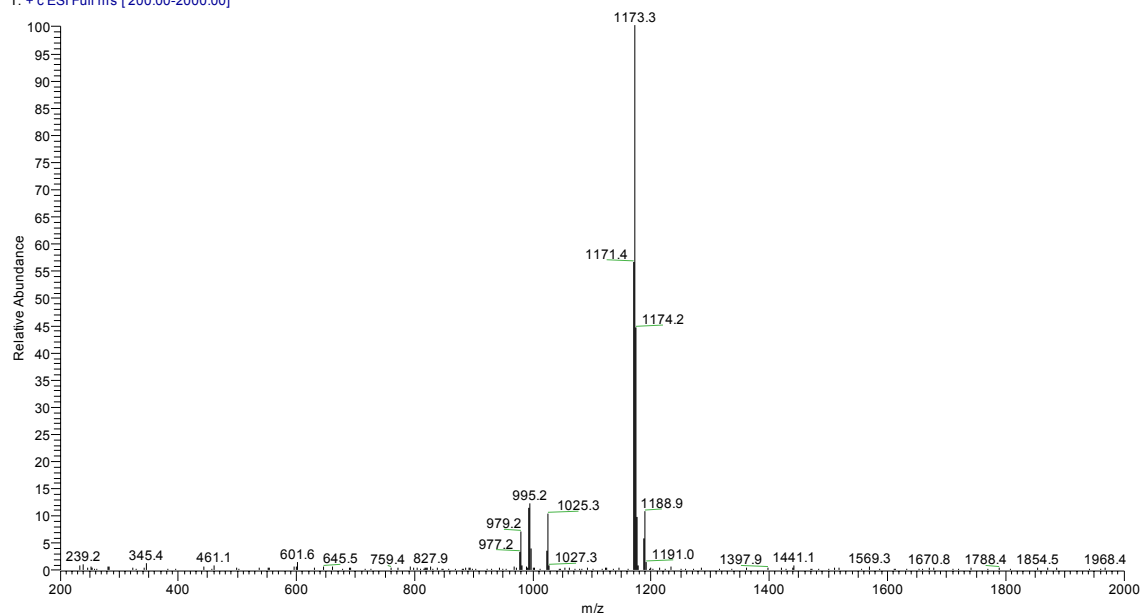

Figure S2. ESI-MS spectrum of  $[\text{Ir}(\text{pq})_2(\text{bpy-sugar})]\text{Cl}$

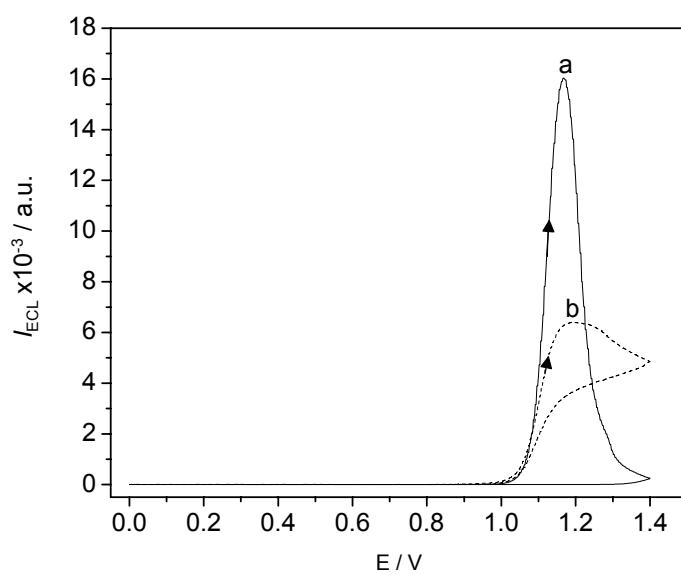

Fig. S3 ECL signals of the  $[\text{Ir}(\text{pq})_2(\text{bpy-sugar})]^+$  (a) and  $[\text{Ru}(\text{bpy})_3]^{2+}$  (b) at a GC electrode in 0.15 M PBS (pH 7.5) containing 5  $\mu\text{M}$  complex and 1 mM TPA. Scan rate: 0.1  $\text{Vs}^{-1}$ .
